# Supplementary material
Source: HighWire-hosted journal article supplement (https://bmjopen.bmj.com/content/13/5/e070082)
Supplement: inline-supplementary-material-4 [file inline-supplementary-material-4.pdf]

## PREDICT Study FORM02: Phenotype

Ethics approval: SCHN 2020/ETH00634

Contact: -----

Study admin use only

REDCap ID    -   **General**1) Date of exam  DD / MM / YY**Patient information**

If available, place patient sticker over dashed outline.

PLACE PATIENT  
STICKER HERE2) First name 3) Last name 4) Other names 5) Date of birth  DD / MM / YY**Examiner information**6) Name 

7) Position

 JMO Fellow Consultant Other: **Anthropometrics**8) Height  cm9) Weight  kg10) Head circumference  cm**Asymmetry**

11) Asymmetry

 None Head Face Limbs**Cranium**

12) Scalp tumours

 Yes No

13) Hair type

Mark all that apply

 Normal Brittle Sparse/fine Coarse

14) Frontal bossing (prominent forehead)

 Yes No**Eyes**

15) Cataract

 Not examined Yes No

16) Visible nerve fibers on cornea

 Not examined Yes No

17) Photosensitivity

Mark all that apply

 No Yes, eyes Yes, skin

18) Eye spacing

 Normal Orbital hypotelorism Orbital hypertelorism

19) Eye size

 Normal Microphthalmia Macrophthalmia

20) Palpebral fissure slant

 Normal Downslanted Upslanted

21) Epicanthal folds

 Yes No

22) Ptosis (drooping eyelid)

 Yes No

23) Abnormalities of eye control

Not explained by primary tumour. Check all that apply.

 None Strabismus Nystagmus Amblyopia Other: 

24) Vision loss

Not explained by primary tumour. Check all that apply.

 None Colour vision deficiency Partial vision loss (bilateral) Hemianopsia Complete blindness

## PREDICT Study FORM02: Phenotype

Ethics approval: SCHN 2020/ETH00634

Contact: -----

Study admin use only

REDCap ID  - **Ears**

25) Ear lobule creases or pits

- Yes  
 No

26) Posterior helical ear pits

- Yes  
 No

27) Abnormal ear shape

If yes, please describe

- Yes:   
 No

**Oral region**

28) Jaw position

Mark all that apply

- Normal  
 Micrognathia  
 Retrognathia  
 Prognathia

29) Lips

Mark all that apply

- Normal  
 Periorificial papilloma  
 Perioral hyperpigmentation  
 Mucosal neuromata

30) Oral cavity

Mark all that apply

- Normal  
 Short superior frenulum  
 Cleft palate  
 Hard palate high/short/narrow

31) Oral mucosa

Mark all that apply. If other, please comment.

- Normal  
 Leukoplakia  
 Gingival overgrowth  
 Papilloma / neuroma  
 Papular fibromatosis  
 Cobblestone  
 Other:

32) Tongue

Mark all that apply

- Normal  
 Macroglossia  
 Geographic  
 Lobulated  
 Glossoptosis  
 Ankyloglossia

Oral region continued on right

**Oral region (continued)**

33) Oral pigmentation

Mark all that apply. If other, please comment.

- Normal  
 Mucocutaneous pigmentation  
 Other:

34) Dental abnormalities

Mark all that apply. If other, please comment.

- Normal  
 Hypodontia (congenital)  
 Hyperdontia  
 Unerupted teeth  
 Impacted teeth  
 Enamel pits  
 Other:

35) Has a mouth X-ray been performed?

Mark all that apply. If other, please comment.

- No, or not known  
 Yes, with no abnormalities identified  
 Yes, with odontogenic keratocysts detected.  
 Yes, with other abnormalities detected:

**Thorax**

36) Supernumerary or widely-spaced nipples

- Yes  
 No

37) Gynaecomastia (in males)

- Yes  
 No  
 Not applicable (patient is female)

**Abdomen**

38) Umbilical hernia

- Yes  
 No

**Joints and skeleton**

39) Neck

Mark all that apply

- Normal  
 Short neck  
 Pterygium colli  
 Redundant neck folds

Joints and skeleton continued on next page

## PREDICT Study FORM02: Phenotype

Ethics approval: SCHN 2020/ETH00634

Contact: -----

Study admin use only

REDCap ID  - **Joints and skeleton** (continued)

## 40) Chest wall deformities

Mark all that apply. If other, please comment.

- None
- Pectus excavatum
- Pectus carinatum
- Cleft sternum
- Other:

## 41) Scoliosis of spine

- Yes
- No

## 42) Limbs

Mark all that apply

- Normal
- Reduced range of movement
- Hypermobile joints
- Absent radius
- Other limb abnormalities:

**Hands and feet**

## 43) Digit abnormalities

Mark all that apply

- None
- Polydactyly
- Syndactyly
- Clinodactyly
- Camptodactyly
- Other:

## 44) Palm / plantar

Mark all that apply

- Normal
- Palmar/plantar pits
- Single palmar crease
- Single plantar crease

## 45) Nails

Mark all that apply

- Normal
- Hypoplastic
- Nail pits

**Genitalia**

## 46) Precocious puberty

- Not applicable (prepubertal)
- No: puberty is age-appropriate
- Yes: precocious puberty present
- Not examined

Genitalia continued on right

**Genitalia** (continued)

## 47) Abnormal genital pigmentation

- Yes
- No
- Not examined

## 48) Ambiguous genitalia

- Yes
- No
- Not examined

## 49) Undescended testicle (if patient is male)

- Yes
- No
- Not examined

**Skin**

## 50) Telangiectasia

- Yes
- No

## 51) Tumours

Mark all that apply

- None  Neurofibromas
- Lipomata  Schwannomas
- Pilomatrixomas
- Sebaceous Adenomas
- Other:

## 52) Blue naevus

- Yes
- No

## 53) Pigmentation

Mark all that apply. If other, please comment.

- Normal
- Café-au-lait spots
- Axillary freckling
- Hyperpigmentation
- Hypopigmentation
- Inguinal freckling
- Other:

If Café-au-lait spots, please comment on number and size

## 54) Palmoplantar hyperkeratosis

- Yes
- No

## 55) Thin skin, or generalised skin atrophy

- Yes
- No

**PREDICT Study FORM02: Phenotype**

Ethics approval: SCHN 2020/ETH00634

Contact: -----

Study admin use only

REDCap ID    -   **Neurological signs**

(Not explained by primary tumour)

56) Ataxia

 Yes No

57) Cranial nerve palsies

 Yes No**Endocrine**

58) Enlarged thyroid

 Yes No

---

End of document
