# Supplementary material
Source: HighWire-hosted journal article supplement (https://bmjopen.bmj.com/content/13/5/e070082)
Supplement: inline-supplementary-material-7 [file inline-supplementary-material-7.pdf]

## Supplemental material

**Appendix 7: Assessment schedule for the psychosocial component****Assessment schedule for the psychosocial component**

| Measure                                     | Intake | Case report form | T0 | T1 | T2-T4 | T2b | Brief Q |
|---------------------------------------------|--------|------------------|----|----|-------|-----|---------|
| Semi-structured interview                   | -      | -                | -  | X  | X     | -   | -       |
| Demographic data                            | -      | X                | X  | -  | -     | -   | -       |
| Decision to participate <sup>1</sup>        | -      | -                | X  | -  | -     | -   | -       |
| PIPseqKQ adapted[21]                        | -      | -                | X  | -  | -     | -   | -       |
| Distress ratings                            | -      | -                | X  | X  | -     | -   | -       |
| Family communication                        | -      | -                | X  | X  | X     | -   | -       |
| Family surveillance                         | -      | -                | -  | X  | X     | -   | -       |
| Trust in Physician scale[22]                | -      | -                | X  | X  | X     | -   | -       |
| Understanding <sup>2</sup>                  | -      | -                | X  | -  | -     | -   | -       |
| Hopes and concerns <sup>2</sup> [14]        | -      | -                | X  | X  | X     | -   | -       |
| Perceived benefit <sup>2</sup> [14]         | -      | -                | X  | -  | -     | -   | -       |
| Who will benefit most <sup>2</sup>          | -      | -                | X  | X  | X     | X   | -       |
| Satisfaction with Decision scale            | -      | -                | X  | X  | X     | X   | -       |
| Satisfaction rating <sup>2</sup>            | -      | -                | X  | X  | X     | X   | -       |
| Decisional Regret scale[23]                 | -      | -                | -  | X  | X     | X   | -       |
| Patient QoL EQ-5D-5L <sup>2</sup> [24]      | -      | -                | X  | X  | X     | -   | X       |
| Parent wellbeing[24]                        | -      | -                | X  | X  | X     | -   | X       |
| Emotion Thermometers Tool <sup>2</sup> [25] | X      | -                | X  | X  | X     | X   | X       |
| Change to health status                     | -      | -                | X  | X  | X     | -   | X       |
| Impact of participation <sup>1</sup>        | -      | -                | X  | X  | -     | -   | -       |
| Impact of COVID-19                          | -      | -                | X  | X  | X     | -   | -       |
| Recommend to others <sup>2</sup>            | -      | -                | X  | X  | X     | X   | -       |
| Open-ended comments <sup>2</sup>            | -      | -                | X  | X  | X     | X   | -       |

T0 = Baseline; T1 = following receipt of results; T2 – T4 = annually following enrolment; Brief Q= Quarterly.

<sup>1</sup>Assessed in patient questionnaires only.

<sup>2</sup>Assessed in patient questionnaires (T0 and T1 only) and parent questionnaires.
